# Supplementary material
Source: Elsevier journal article supplement (https://www.sciencedirect.com/science/article/pii/S0213911112002701)
Supplement: mmc1 [file S0213911112002701:mmc1.doc]

**Tabla I**

Gasto sanitario público según funciones de gasto (1998-2008). Fuente: elaboración propia a partir de los datos de SHA y EGSP

|  | **1998** | | **2003** | | **2008** | |
| --- | --- | --- | --- | --- | --- | --- |
|  | **Miles de € corrientes** | **(%)** | **Miles de € corrientes** | **(%)** | **Miles de € corrientes** | **(%)** |
| Gasto sanitario total | 29.167.290 | (100 | 41.956.640 | (100) | 65.067.710 | (100) |
|  |  |  |  |  |  |  |
| Atención primaria | 5.127.384 | (17,58) | 6.561.856 | (15,64) | 10.443.678 | (16,05) |
| Servicios especializados sin internamiento | 4.615.981 | (15,83) | 8.479.724 | (20,21) | 13.836.922 | (21,27) |
| Servicios hospitalarios (atención con ingreso) | 9.379.210 | (32,16) | 12.122.010 | (28,89) | 19.985.380 | (30,71) |
| Farmacia (recetas médicas) | 6.160.577 | (21,12) | 9.611.390 | (22,91) | 12.720.570 | (19,55) |
| Traslados | 341.022 | (1,17) | 571.190 | (1,36) | 1.085.240 | (1,67) |
| Prótesis y aparatos terapéuticos | 141.148 | (0,48) | 166.790 | (0,40) | 200.390 | (0,31) |
| Otro gasto sanitario | 3.401.970 | (11,66) | 4.443.680 | (10,59) | 6.795.530 | (10,44) |

*Nota:* la serie de gasto es homogénea y está calculada con el criterio de devengo a partir de las series que proporciona el Ministerio de Sanidad. El enlace se ha realizado estimando, para el periodo 1988-2001 y para cada partida de gasto, los datos de la serie de la EGSP calculados con criterio de devengo a partir de las tasas de variación registradas por la serie calculada con criterio de caja. Posteriormente se ha ajustado una línea polinómica para el periodo 1988-2008 con objeto de suavizar la serie. En aquellas partidas donde los años para los que se dispone de datos con ambos criterios tenían un paralelismo claro no se ha hecho ajuste, sino que se ha mantenido la evolución hacia atrás según las tasas de variación de la serie de caja.

**Figura 1.I.** Evolución de los perfiles de gasto en atención sin internamiento (primaria y especializada) 1998-2008. Euros constantes de 1998 per cápita. Hombres. Fuente: elaboración propia.


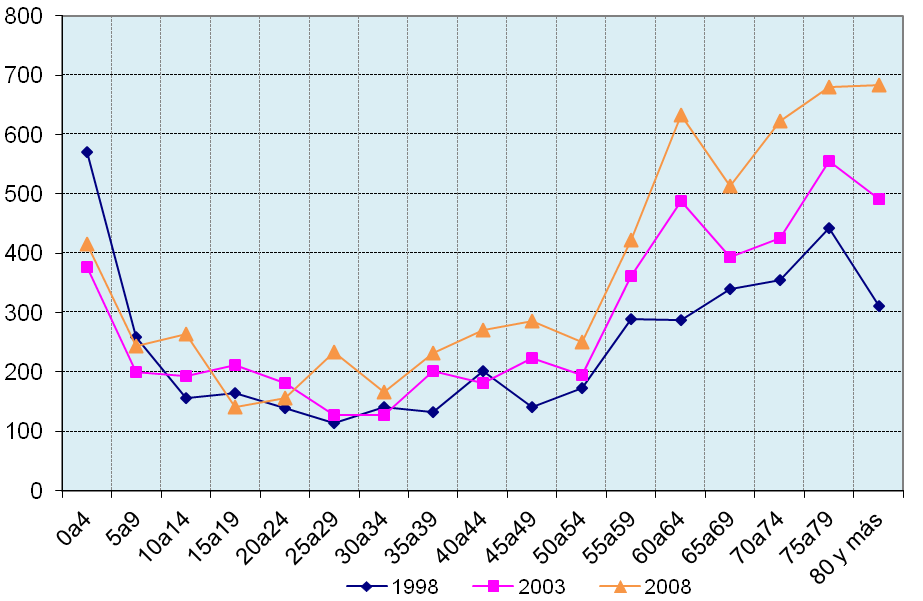


**Figura 1.II.** Evolución de los perfiles de gasto en atención sin internamiento (primaria y especializada) 1998-2008. Euros constantes de 1998 per cápita. Mujeres. Fuente: elaboración propia.

**
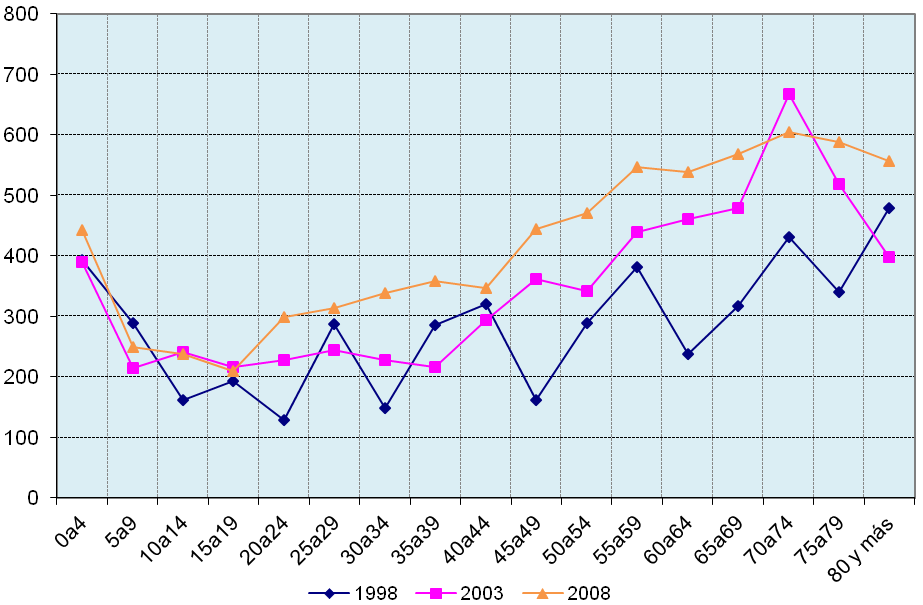
**

**Figura 2.I.** Evolución de los perfiles de gasto en asistencia con internamiento 1998-2008. Euros constantes de 1998 per cápita. Hombres. Fuente: elaboración propia.


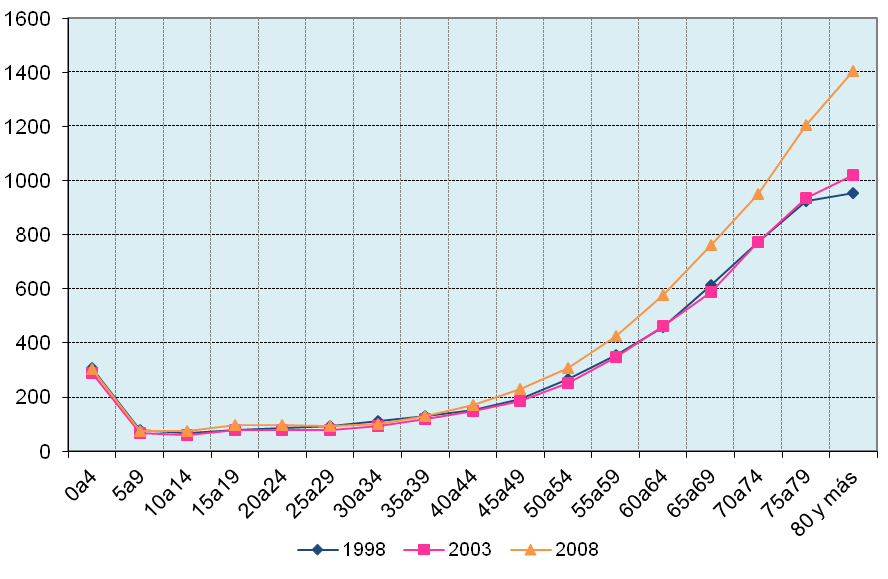


**Figura 2.II.** Evolución de los perfiles de gasto en asistencia con internamiento 1998-2008. Euros constantes de 1998 per cápita. Mujeres. Fuente: elaboración propia.


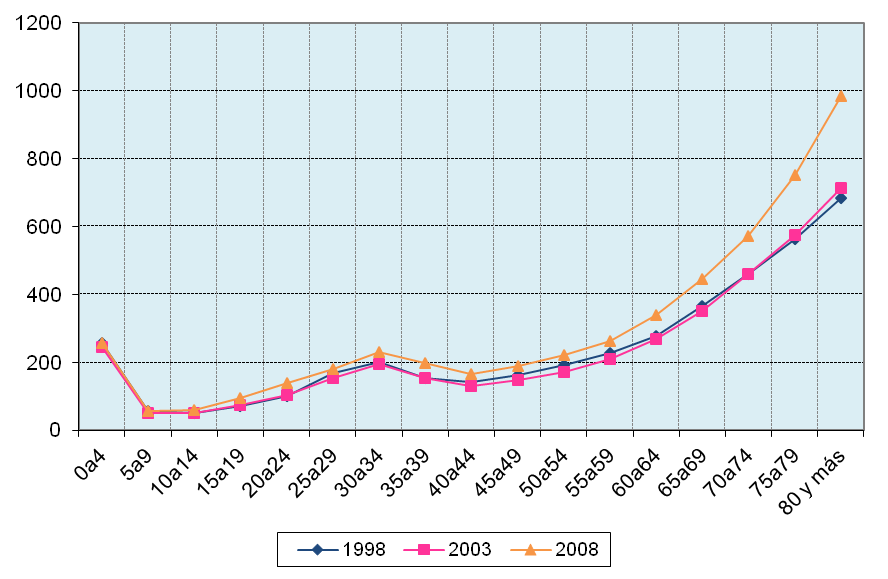


**Figura 3.I.** Evolución de los perfiles de gasto en farmacia 1998-2008. Euros constantes de 1998 per cápita. Hombres. Fuente: elaboración propia.


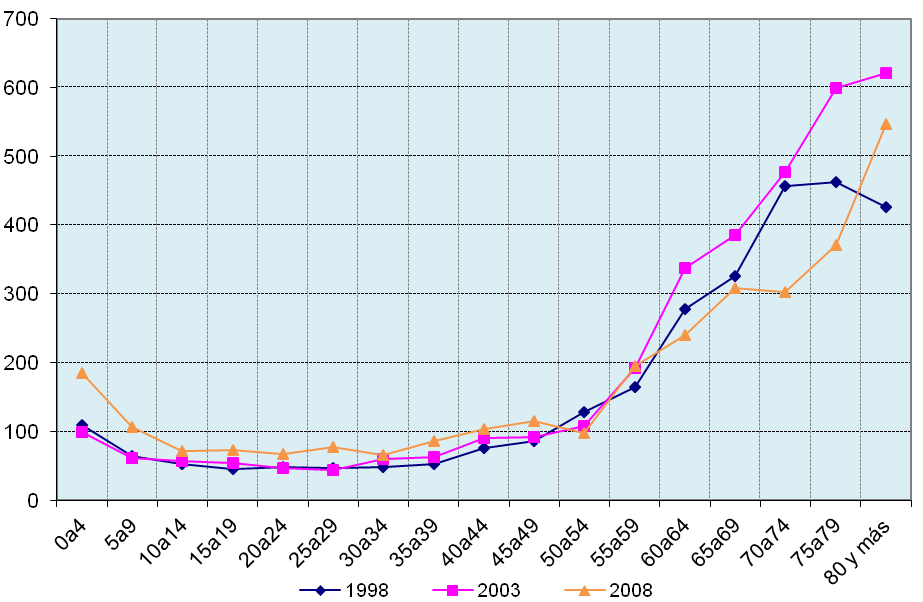


**Figura 3.II.** Evolución de los perfiles de gasto en farmacia 1998-2008. Euros constantes de 1998 per cápita. Mujeres. Fuente: elaboración propia.


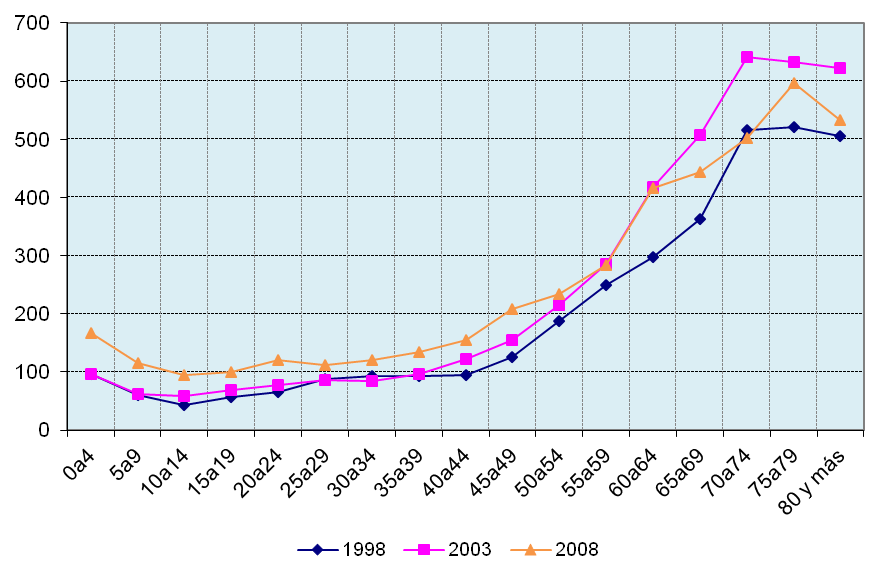


**Figura 4.I.** Evolución de los perfiles de gasto sanitario público 1998-2008. Euros constantes de 1998 per cápita. Hombres. Fuente: elaboración propia.


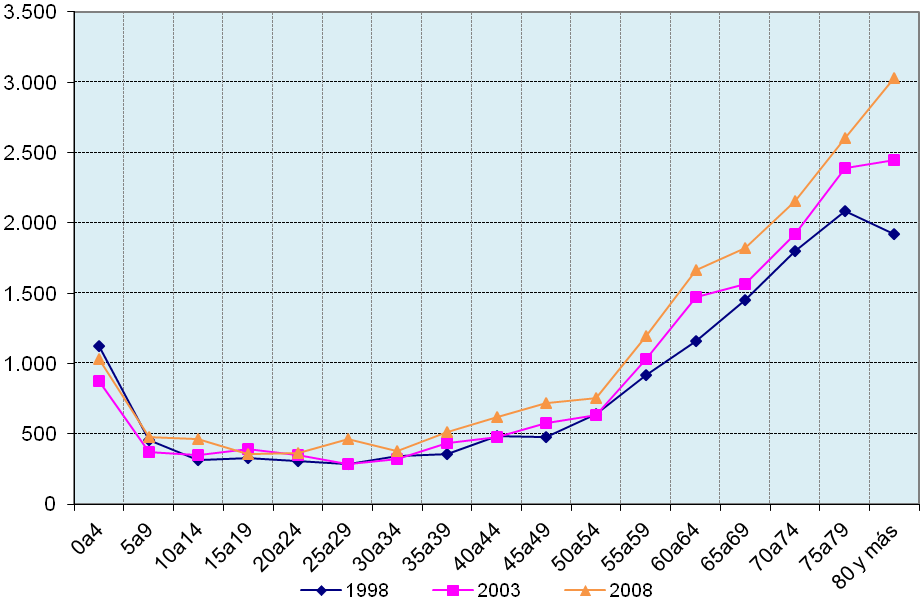


**Figura 4.II.** Evolución de los perfiles de gasto sanitario público 1998-2008. Euros constantes de 1998 per cápita. Mujeres. Fuente: elaboración propia.

**
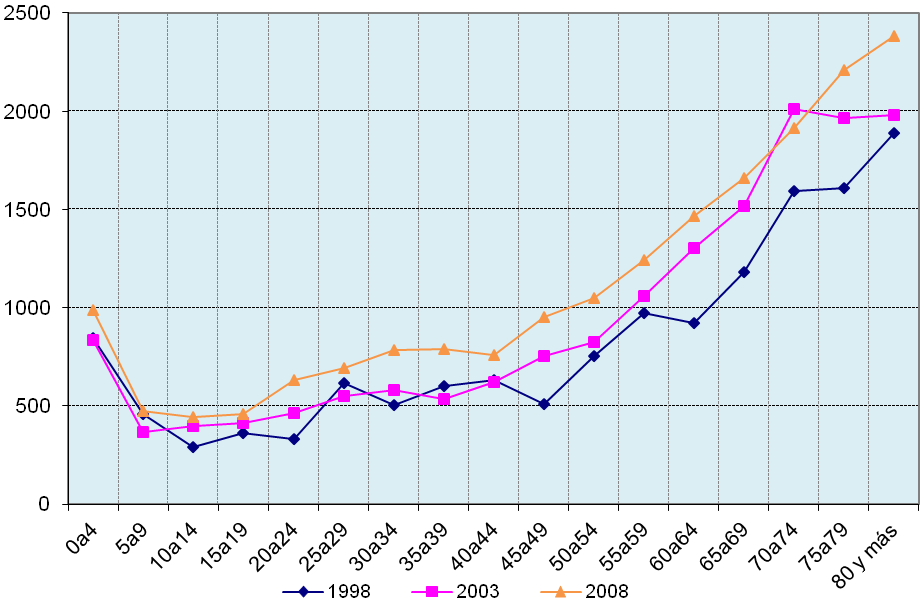
**
